# Supplementary material for: Highly efficient bifacial CsPbIBr2 solar cells with a TeO2/Ag transparent electrode and unsymmetrical carrier transport behavior
Source: Royal Society of Chemistry journal article supplement (doi:10.1039/d0dt00407c), 2020-01-01
Supplement: d0dt00407c1.pdf [file d0dt00407c1.pdf]

## Supporting information

# **Highly Efficient bifacial CsPbIBr<sub>2</sub> solar cells with TeO<sub>2</sub>/Ag transparent electrode and unsymmetrical carrier transport behavior**

Dazheng Chen<sup>1,\*</sup>, Gang Fan<sup>1</sup>, Weidong Zhu<sup>1</sup>, Haifeng Yang<sup>2</sup>, He Xi<sup>3</sup>,  
Fengqing He<sup>1</sup>, Zhenhua Lin<sup>1</sup>, Jincheng Zhang<sup>1</sup>, Chunfu Zhang<sup>1,\*</sup>, and  
Yue Hao<sup>1</sup>

1 Wide Bandgap Semiconductor Technology Disciplines State Key Laboratory, School of Microelectronics, Xidian University, Xi'an 710071, China

2 College of Physics and Optoelectronics Technology, Baoji University of Arts and Sciences, Baoji 721016, China

3 School of Advanced Materials and Nanotechnology, Xidian University, Xi'an 710071, China

\* Correspondence: dzchen@xidian.edu.cn; cfzhang@xidian.edu.cn

## **1. Experimental details**

### **1.1 Materials and Reagents**

Ultradry  $\text{PbBr}_2$  (99.999%) and  $\text{CsI}$  (99.998%) and anhydrous DMSO (99.9+%, ACS reagent) are purchased from Alfa Aesar. FTO glasses (Pilkington, TEC-8,  $8\Omega/\text{sq}$ ) are received from Yingkou OPV Tech New Energy Co., Ltd., China. All of them are used as received without further purification and modifications.

### **1.2 Preparation of c-TiO<sub>2</sub>/FTO Substrate**

FTO substrate was cleaned by sequential sonication in detergent, deionized water, acetone, and alcohol for 1 h. After being dried by  $\text{N}_2$  flow, it was further treated by ultraviolet ozone cleaner for 15 min. After that, a  $\approx 60$  nm c-TiO<sub>2</sub> ETL can be coated on the cleaned FTO substrate by spin-coating a TiO<sub>2</sub> sol at 3500 rpm for 30 s with immediate thermal annealing at 480°C for 60 min in air.

### **1.3 Preparation of CsPbIBr<sub>2</sub> Film**

1.0M  $\text{CsPbIBr}_2$  precursor solution was prepared by fully dissolving 260 mg  $\text{CsI}$  and 367 mg  $\text{PbBr}_2$  in 1 mL DMSO at room temperature.  $\text{CsPbIBr}_2$  precursor film can be obtained by spin-coating precursor solution on c-TiO<sub>2</sub>/FTO substrate at 1500 rpm for 20 s and 5000 rpm for 60 s. As an optimized device, 50  $\mu\text{L}$  methanol solution containing 30 mg/mL  $\text{CsI}$  is spin-coated on  $\text{CsPbIBr}_2$  precursor film at 5000 rpm for 20 s. After being washed with IPA, it was annealed at 280°C for 10min.

Thus, the CsPbIBr<sub>2</sub> film was obtained and labeled as intermolecular exchange [1]. For comparison, the one as control device without CsI treatment. The film was obtained by directly annealing the CsPbIBr<sub>2</sub> precursor film under 280°C for 10 min.

#### **1.4 Fabrication of Solar Cells**

The 75uL 90 mg/ml spiro-OMeTAD CB solution prepared in advance was spin-coated on the perovskite film at a speed of 1000 rpm for 5 s and 3000 rpm for 45 s, and allowed to stand for two or three minutes. Place in a dry environment and wait for spiro-OMeTAD to be oxidized for one day, then deposit an 11 nm ultra-thin Ag electrode in the thermal evaporation system, next a 40 nm TeO<sub>2</sub> film was coated as an optical modifying layer, and finally evaporate a 100 nm Ag film to act as the contact electrodes. The thicknesses of Ag and TeO<sub>2</sub> were estimated in situ with a calibrated quartz crystal monitor. And this gives the bifacial semitransparent CsPbIBr<sub>2</sub> perovskite solar cells with an active area of 7 mm<sup>2</sup>. At the same time, the cells of Glass/FTO/TiO<sub>2</sub>/CsPbIBr<sub>2</sub>/ spiro-OMeTAD/Ag(100 nm) and Glass/FTO/TiO<sub>2</sub>/CsPbIBr<sub>2</sub>/Carbon were prepared as the reference devices. Here, the carbon electrode was deposited by silkscreen-printing conductive carbon paste, followed by heating at 100 °C for 10 min in ambient air to promote the evaporation of residual solvent in printed Carbon layer.

#### **1.5 Device characterization**

The photovoltaic performances of bifacial PSCs were measured by the Keithley 2400 source meter under the simulated AM 1.5G (One sun) illumination of  $1000 \text{ W/m}^2$  from a sunlight simulator (Sanei Electric, XES-300T1). The illumination intensity was calibrated by a reference silicon cell certificated by the National Renewable Energy Laboratory. The external quantum efficiency of PSCs was measured by the quantum efficiency measurement system (SCS10-X150, Zolix instrument. Co. Ltd). The transmittance spectra were measured by the UV-visible spectrophotometer (Perkin-Elmer Lambda 950). The film morphology were characterized by a JSM-7800F extreme-resolution analytical field emission scanning electron microscope (SEM), the crystal quality were assessed by the X-ray diffractometer (D8 Advance, Bruker, Germany) and steady photoluminescence (PL) spectra recorded by a Fluorescence Spectrophotometer (Hitachi F-7000) with a 460 nm excitation. Transient photovoltage (TPV) measurement was performed with the same system excited by a 405 nm (50 Hz, 20ms) pulse laser. A digital oscilloscope (Tektronix, D4105, Beaverton, OR, USA) was used to record the photocurrent or photo-voltage decay process with a sampling resistor of  $50\Omega$  or  $1\text{M}\Omega$ , respectively. EIS measurements were performed on an electrochemical workstation (CHI600E, Shanghai Chenhua) with a 10 mV amplitude perturbation and frequencies between 100Hz and 1MHz. Nyquist plots were recorded on the same system under AC excitation

amplitude of 30 mV at a frequency of 5kHz. All the measurements were performed at room temperature under ambient atmosphere.

## 2. Experimental results

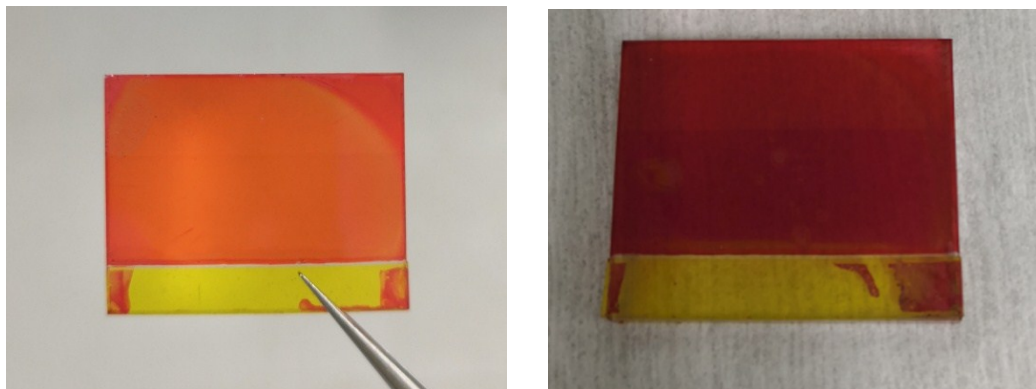

Figure S1 Photos of control (left) and CsI treated (right) CsPbIBr<sub>2</sub> films.

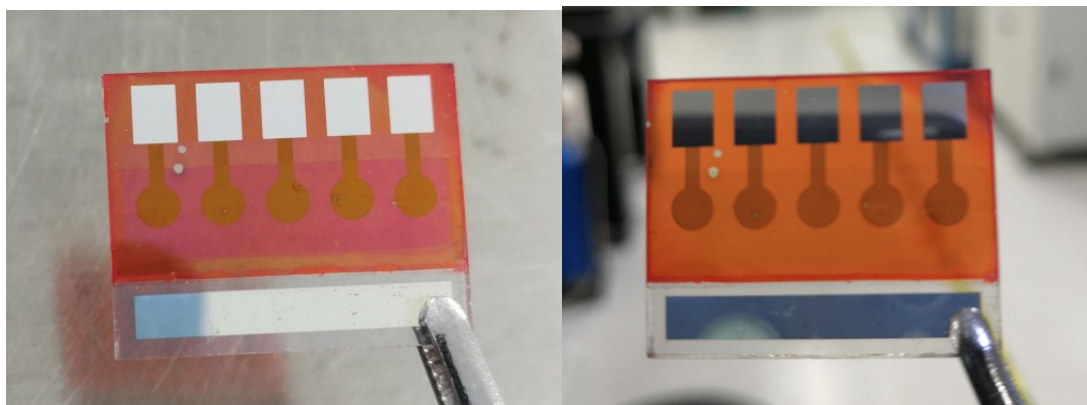

Figure S2 Photos of bifacial CsPbIBr<sub>2</sub> perovskite solar cells taken from the TeO<sub>2</sub>/Ag side (left) and FTO side (right).

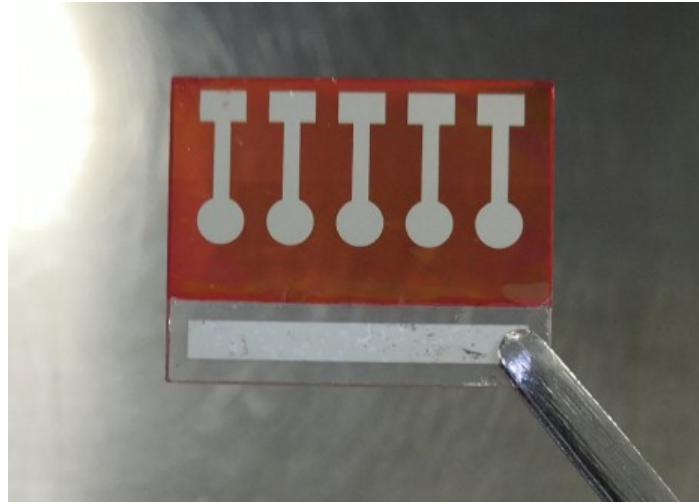

Figure S3 Photos of reference cell with 100 nm opaque Ag electrode, a structure of Glass/FTO/TiO<sub>2</sub>/CsPbIBr<sub>2</sub>/spiro-OMeTAD/Ag(100 nm).

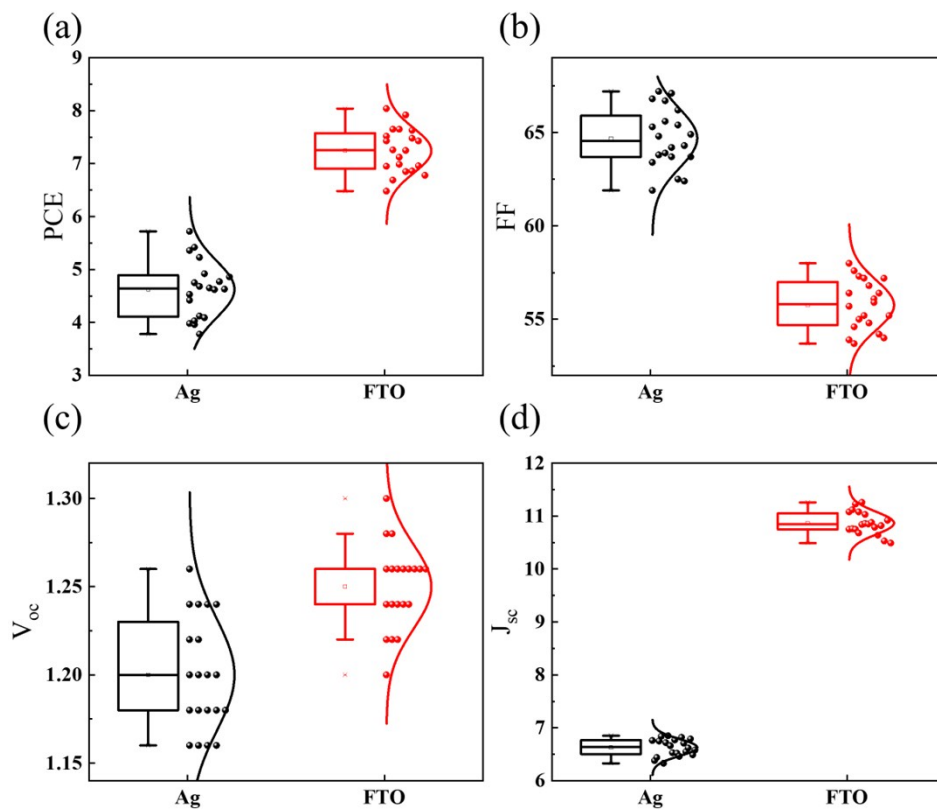

Figure S4 Statistical PCE, Voc, FF, Jsc of bifacial control CsPbIBr<sub>2</sub> PSCs with Ag/TeO<sub>2</sub> electrodes, which corresponding to the results of Fig. 3.

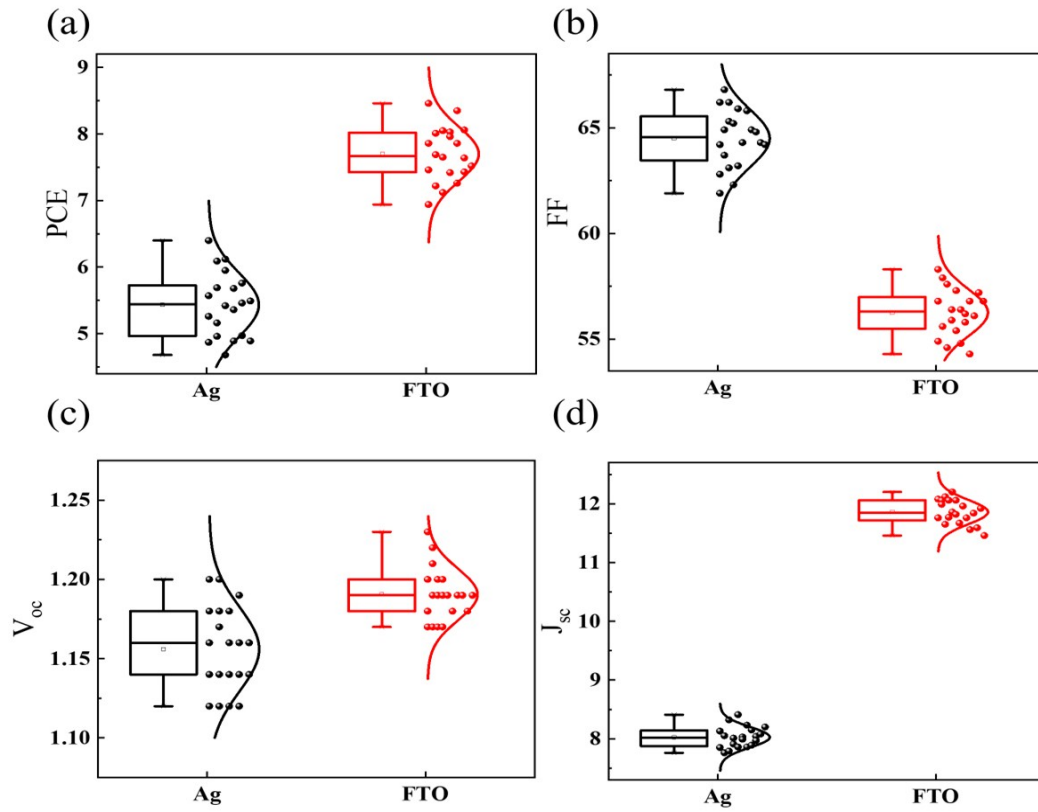

Figure S5 Statistical PCE,  $V_{oc}$ , FF,  $J_{sc}$  of bifacial CsI-CsPbIBr<sub>2</sub> PSCs with Ag/TeO<sub>2</sub> electrodes, which corresponding to the results of Fig. 3.

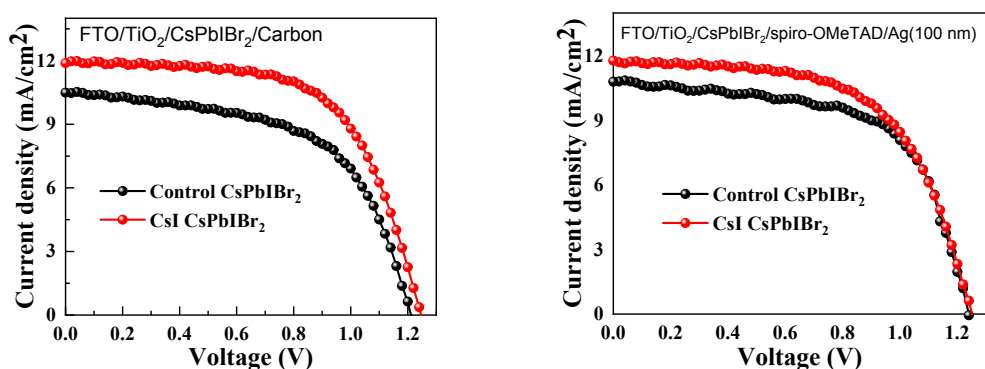

| Reference cells     | PCE (%) | FF (%) | V <sub>OC</sub> (V) | J <sub>SC</sub> (mA/cm <sup>2</sup> ) |
|---------------------|---------|--------|---------------------|---------------------------------------|
| control- Ag(100 nm) | 8.30    | 62.61  | 1.22                | 10.86                                 |
| CsI- Ag(100 nm)     | 8.81    | 60.29  | 1.24                | 11.78                                 |
| control-Carbon      | 8.35    | 63.16  | 1.20                | 11.03                                 |
| CsI-Carbon          | 9.22    | 62.09  | 1.24                | 11.98                                 |

Figure S6 JV curves and photovoltaic parameters of reference CsPbIBr<sub>2</sub> PSCs based on opaque Ag(100 nm) and carbon electrodes.

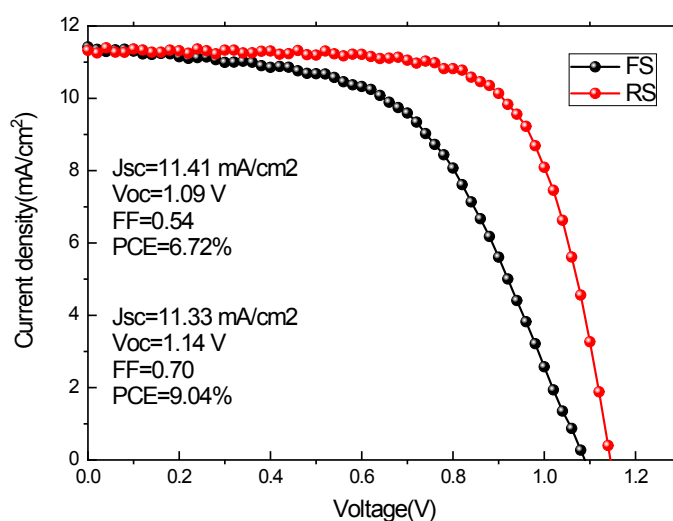

Fig. S7 (a) JV curves for control CsPbIBr<sub>2</sub> PSC under simulated AM 1.5 G illumination with forward scan (FS) and Reverse scan (RS).



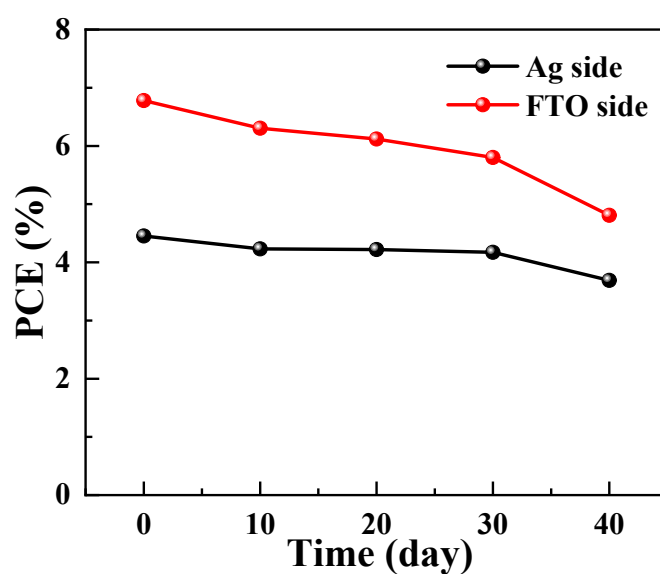

Fig. S8 Time-dependent PCEs for the un-encapsulated champion cells storing in a glovebox.

[1] Zhu, W.; Zhang, Q.; Chen, D.; Zhang, Z.; Lin, Z.; Chang, J.; Zhang, J.; Zhang, C.; Hao, Y. Intermolecular Exchange Boosts Efficiency of Air-Stable, Carbon-Based All-Inorganic Planar CsPbIBr<sub>2</sub> Perovskite Solar Cells to Over 9%. *Adv. Energy Mater.* 2018, 8, 1802080.
